1 **The importance of the immunodominant CD8+ T cell epitope of *Plasmodium berghei***  
2 **circumsporozoite protein in parasite- and vaccine-induced protection**

3

4 Matthew P. Gibbins <sup>a</sup>, Katja Müller <sup>b,c</sup>, Maya Glover <sup>a</sup>, Jasmine Liu <sup>a</sup>, Elyzana D. Putrianti <sup>b,c</sup>,  
5 Karolis Bauza <sup>d</sup>, Arturo Reyes-Sandoval <sup>d</sup>, Kai Matuschewski <sup>b,c</sup>, Olivier Silvie <sup>e</sup>, Julius  
6 Clemence R. Hafalla <sup>a#</sup>

7

8 <sup>a</sup>Department of Immunology and Infection, Faculty of Infectious and Tropical Diseases, London  
9 School of Hygiene and Tropical Medicine, London, United Kingdom

10 <sup>b</sup>Parasitology Unit, Max Planck Institute for Infection Biology, Berlin, Germany

11 <sup>c</sup>Department of Molecular Parasitology, Institute of Biology, Humboldt University, Berlin,  
12 Germany

13 <sup>d</sup>Jenner Institute, Nuffield Department of Medicine, University of Oxford, United Kingdom

14 <sup>e</sup>Sorbonne Université, INSERM, CNRS, Centre d'Immunologie et des Maladies Infectieuses,  
15 CIMI-Paris, Paris, France

16

17 Running Head: Immunodominant malaria CD8+ T cell epitope

18

19 #Address correspondence to Julius Clemence R. Hafalla, [Julius.Hafalla@lshtm.ac.uk](mailto:Julius.Hafalla@lshtm.ac.uk)

20

21 **ABSTRACT**

22 The circumsporozoite protein (CSP) builds up the surface coat of sporozoites and is the leading  
23 malaria pre-erythrocytic-stage vaccine candidate. CSP has been shown to induce robust CD8+  
24 T cell responses that are capable of eliminating developing parasites in hepatocytes resulting  
25 in protective immunity. In this study, we characterised the importance of the immunodominant  
26 CSP-derived epitope, SYIPSAEKI, of *Plasmodium berghei* in both sporozoite- and vaccine-  
27 induced protection in murine infection models. In BALB/c mice, where SYIPSAEKI is efficiently  
28 presented in the context of the major histocompatibility complex class I (MHC-I) molecule H-  
29 2-K<sup>d</sup>, we established that epitope-specific CD8+ T cell responses contribute to parasite killing  
30 following sporozoite immunisation. Yet, sterile protection was achieved in the absence of this  
31 epitope substantiating the concept that other antigens can be sufficient for parasite-induced  
32 protective immunity. Furthermore, we demonstrated that SYIPSAEKI-specific CD8+ T cell  
33 responses elicited by viral-vectored CSP-expressing vaccines effectively targeted parasites in  
34 hepatocytes. The resulting sterile protection strictly relied on the expression of SYIPSAEKI. In  
35 C57BL/6 mice, which are unable to present the immunodominant epitope, CSP-based  
36 vaccines did not confer complete protection, despite the induction of high levels of CSP-  
37 specific antibodies. These findings underscore the significance of CSP in protection against  
38 malaria pre-erythrocytic stages and demonstrate that a significant proportion of the protection  
39 against the parasite is mediated by CD8+ T cells specific for the immunodominant CSP-derived  
40 epitope.

41

## 42 INTRODUCTION

43 Malaria is caused by a protozoan parasite of the genus *Plasmodium* and remains a major  
44 global health challenge in tropical and subtropical countries (1). A vaccine that diminishes the  
45 burden of disease and prevents malaria transmission remains a decisive goal for malaria  
46 elimination programmes. As a gold standard in malaria vaccination, multiple immunisations of  
47  $\gamma$ -radiation-attenuated *Plasmodium* sporozoites (RAS) can completely protect against wild-  
48 type (WT) sporozoite challenge (2-4). This parasite-induced protection targets the developing  
49 exo-erythrocytic forms in hepatocytes, also called liver stages, and completely abrogates blood  
50 stage infection. Antibodies and T cells have been implicated as important mechanisms of  
51 protection (5), and CD8<sup>+</sup> T cells are the prime mediators of cell-mediated protective immunity,  
52 as exemplified in murine (6, 7) and non-human primate (8) infection models.

53

54 The circumsporozoite protein (CSP), the major surface coat protein of the malaria sporozoite,  
55 has been at the forefront of vaccination studies – being the basis of RTS,S/AS01, the most  
56 progressed malaria vaccine candidate to date (9). Immunisation of BALB/c mice  
57 with *Plasmodium berghei* (*Pb*) or *P. yoelii* (*Py*) RAS evokes immunodominant major  
58 histocompatibility complex class I (MHC-I) H-2-K<sup>d</sup>-restricted CD8<sup>+</sup> T cell responses against  
59 distinct CSP epitopes: SYIPSAEKI for *Pb* (10) and SYVPSAEQI for *Py* (11). Indeed, the  
60 measurement of responses to these epitopes has become the standard in fundamental  
61 immunological studies in BALB/c mice (12-14). Furthermore, numerous vaccination studies  
62 involving different viral-vectored CSP- or CSP epitope-expressing vaccines – used alone or in  
63 combination as part of prime-boost regimens – have corroborated that CSP is a highly  
64 protective antigen in the BALB/c infection model (12-18). In these studies, elevated levels of  
65 either SYIPSAEKI- or SYVPSAEQI-specific CD8<sup>+</sup> T cell responses correlated with protection.

66

67 Several studies have interrogated and contested the immunological relevance of CSP in  
68 parasite-induced protection. These studies emanated from observations that in naturally  
69 exposed humans T cell responses to CSP are scarce (19). In murine malaria models, multiple  
70 immunisations are required to elicit CD8<sup>+</sup> T cell-dependent protective immunity in various

71 mouse strains, particularly where no other CSP-derived CD8+ T cell epitopes have been  
72 identified (20). Furthermore, in *Py*CSP-transgenic BALB/c mice that are tolerant to *Py*CSP,  
73 complete protection can be achieved by *Py* RAS immunisation (21). In good agreement,  
74 BALB/c mice immunised with *Pb* WT parasites are completely protected when challenged with  
75 transgenic *Pb* parasites where the endogenous CSP has been swapped with the *P. falciparum*  
76 CSP (22). Taken together, these studies indicate that immune responses to CSP are  
77 dispensable for protection, and that other antigens are important to elicit protective immunity.

78

79 In this study, we have extended previous work on the entire CSP by dissecting the relevance  
80 of a single CSP-derived immunodominant epitope in parasite- and vaccine-induced protection.

81 As the most stringent model system, we utilised transgenic *Pb* parasites lacking SYIPSAEKI  
82 for immunisation and challenge experiments in BALB/c mice. In addition, we have highlighted  
83 the level of protection achieved by CSP-based vaccines in mice expressing the relevant  
84 (BALB/c) or irrelevant (C57BL/6) MHC-I needed to present the CSP-derived immunodominant  
85 epitope.

86

## 87 RESULTS

### 88 Sporozoite-induced SYIPSAEKI-specific CD8<sup>+</sup> T cell responses contribute to parasite 89 killing but are dispensable for the development of sterile immunity.

90 First, we interrogated the role that SYIPSAEKI, the H-2-K<sup>d</sup>-restricted immunodominant epitope  
91 of *PbCSP*, plays in protective immunity induced after live attenuated sporozoite immunisation.  
92 For this purpose, *PbCSP*<sup>SIINFEKL</sup> radiation-attenuated sporozoites (RAS), where the SYPSAEKI  
93 sequence has been replaced with the H-2-K<sup>b</sup>-restricted epitope of ovalbumin, SIINFEKL ((23),  
94 Müller and Gibbins et al., unpublished) were used to immunise H-2-K<sup>d</sup>-expressing BALB/c  
95 mice. To date, there are no other reported H-2-K<sup>d</sup>-restricted *PbCSP* epitopes identified.  
96 Removal of SYPSAEKI, by replacement with an irrelevant epitope, in the *PbCSP*<sup>SIINFEKL</sup>  
97 parasites allows unequivocal assignment of critical roles of this immunodominant *PbCSP*-  
98 derived epitope in protection elicited by live sporozoite immunisations. Two weeks after  
99 immunisation, the frequencies of IFN- $\gamma$ -producing SYIPSAEKI-specific CD8<sup>+</sup> T cell responses  
100 in the spleen after gating for CD11a expression (an activation marker commonly used to  
101 identify antigen-experienced cells (24)) were measured by flow cytometry (Fig. 1A). As  
102 expected, *PbCSP*<sup>SIINFEKL</sup> RAS parasites elicited no SYIPSAEKI-specific CD8<sup>+</sup> T cell responses  
103 in BALB/c mice.

104

105 To ascertain whether SYIPSAEKI contributes to parasite-induced protection, BALB/c mice  
106 were immunised once with either *PbWT* or *PbCSP*<sup>SIINFEKL</sup> RAS. Two weeks after immunisation,  
107 the mice were challenged with *PbWT* sporozoites and protection was determined by  
108 measuring the parasite loads in the liver 40 hours later (Fig. 1B). A significant reduction in  
109 parasite load – up to four orders of magnitude difference as compared to naïve mice – was  
110 observed in mice immunised with *PbWT* RAS and challenged with *PbWT* parasites. In contrast,  
111 protection was reduced only by approximately two orders of magnitude in mice immunised with  
112 *PbCSP*<sup>SIINFEKL</sup> RAS (Fig. 1B). These results highlight the notion that within *PbCSP*, the  
113 SYIPSAEKI epitope has a critical and immunodominant contribution to protecting BALB/c mice  
114 after one or two immunisations with RAS.

115

116 However, multiple immunisations with RAS are required to induce sterile protection. To  
117 establish whether the development of sterile immunity is dependent on SYIPSAEKI-specific  
118 CD8+ T cell responses, BALB/c mice were immunised thrice with *PbCSP*<sup>SIINFEKL</sup> RAS one week  
119 apart; two weeks after the last immunisation, mice were challenged with *PbWT* sporozoites  
120 (Fig. 1C). All mice were protected from blood stage infection compared to the naïve controls,  
121 implying that SYIPSAEKI-specific CD8+ T cell responses are not necessary for the  
122 development of sterile immunity.  
123

124

125

126

127

128

129

130

131

132

133

134

135

**A**

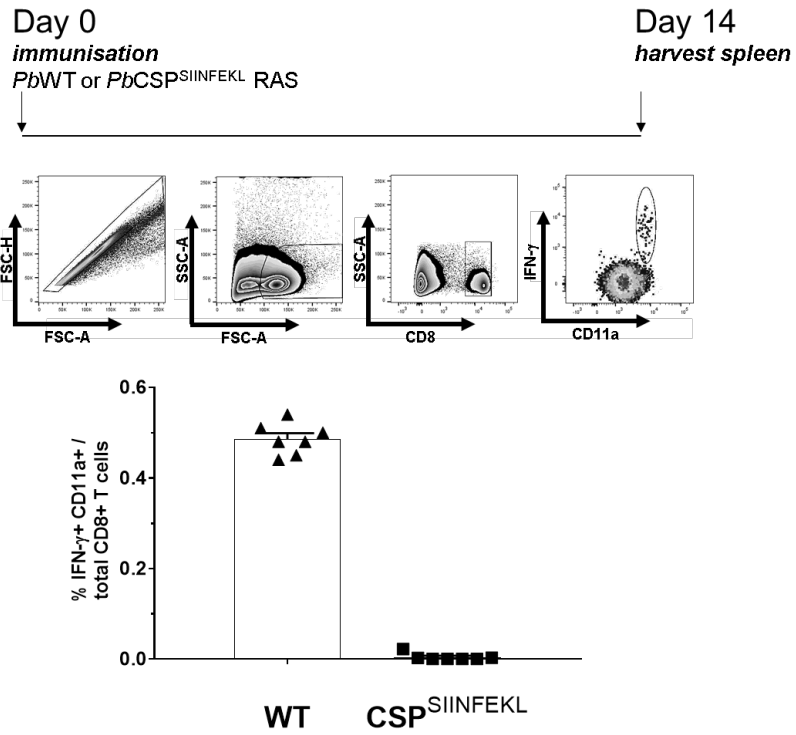

**B**

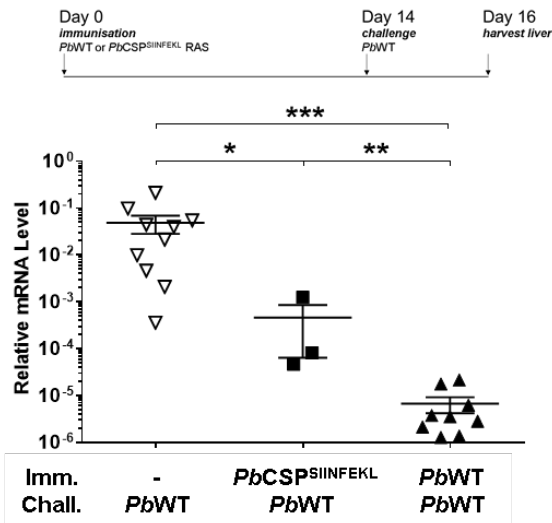

**C**

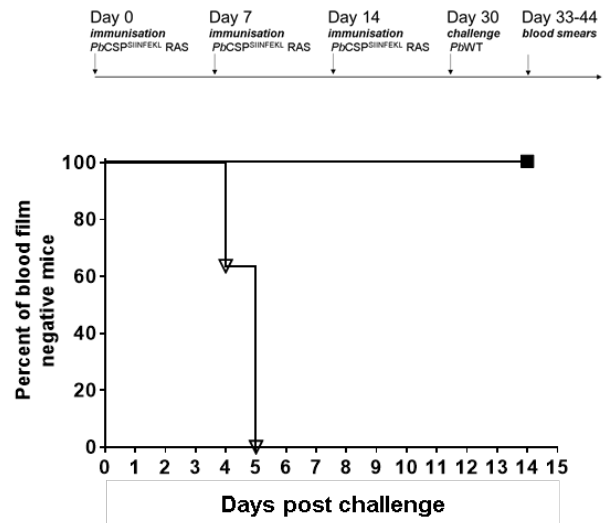

136

137

138

139

140

141

142

143 **FIG 1** SYIPSAEKI is dispensable for RAS immunisation but predominates protection with fewer  
144 immunisations. (A) BALB/c mice were immunised once with 10,000 *PbWT* or *PbCSP*<sup>SIINFEKL</sup>  
145 RAS. Splenocytes were taken after two weeks and restimulated with SYIPSAEKI peptide. IFN-  
146  $\gamma$ -producing cells co-staining with CD11a were assessed by flow cytometry. Shown are the  
147 time course (top), the gating strategy (centre) and proportion of IFN- $\gamma$ -producing CD11a of total  
148 CD8+ T cells (bottom). (B) Groups of BALB/c mice were immunised once with 15,000 *PbWT*  
149 or *PbCSP*<sup>SIINFEKL</sup> RAS. Immunised mice and BALB/c naïve controls (n=3-10) were challenged  
150 with 10,000 *PbWT* parasites two weeks after the last immunisation. Livers were harvested 40  
151 hours post-challenge and the relative liver parasite loads were quantified using the  $\Delta\Delta C_t$   
152 method comparing levels of *P. berghei* 18S rRNA and levels of mouse *GAPDH* mRNA. Mean  
153 values ( $\pm$ SEM) are shown and statistics were calculated using the Mann-Whitney U-test (\*,  
154 p<0.05; \*\*, p<0.01; \*\*\*, p<0.001). (C) BALB/c mice (n=12) were immunised with three doses  
155 of 10,000 *PbCSP*<sup>SIINFEKL</sup> RAS at one-week intervals. Immunised mice and naïve controls (n=11)  
156 were challenged with 5,000 *PbWT* sporozoites 16 days after the last immunisation. Blood  
157 smears were taken daily for two weeks after challenge. Parasitaemia was assessed by  
158 microscopic examination of Giemsa-stained smears. Data shown is a combination of two  
159 independent experiments.  
160



161 **Prime-boost vaccination with CSP-expressing viruses induces strong anti-CSP**  
162 **antibody and CD8+ T cell responses and SYIPSAEKI is the key mediator of sterile**  
163 **protection.**

164 Next, we probed the requirement for SYIPSAEKI presentation in protection elicited by viral-  
165 vectored CSP-expressing vaccines administered in a prime-boost regimen. Priming with  
166 adenovirus (Ad) carrying a foreign antigen and boosting with orthopoxvirus modified vaccinia  
167 Ankara (MVA) expressing the same antigen has consistently been shown to induce strong  
168 CD8+ T cell responses with high levels of protective efficacy against intracellular pathogens  
169 including malaria pre-erythrocytic stages (15, 18).

170

171 Chimpanzee adenovirus serotype 63 (AdCh63) and MVA vaccines expressing *PbCSP* were  
172 used to vaccinate BALB/c mice with a two-week resting period between priming and boosting  
173 (Fig. 2A). Two weeks after boosting, whole blood was collected and restimulated *ex vivo* with  
174 SYIPSAEKI peptide. The frequencies of IFN- $\gamma$  secreting CD8+ T cells were enumerated by  
175 flow cytometry (Fig. 2B) and Ad-MVA *PbCSP*-vaccinated mice elicited ~12% SYIPSAEKI-  
176 specific circulating CD8+ T cells (Fig. 2C). Serum samples were also collected from the  
177 vaccinated animals and were used in an immunofluorescence assay against air-dried *Pb*  
178 sporozoites (Fig. 2D). Ad-MVA *PbCSP*-vaccinated BALB/c mice induced high anti-CSP  
179 antibody titres (1:10<sup>4</sup>). These data indicate that Ad-MVA *PbCSP* vaccination elicit both high  
180 frequencies of SYPSAEKI-specific CD8+ T cells and high titres of CSP-specific antibodies.

181

182 Two weeks after boosting, Ad-MVA *PbCSP*-vaccinated mice were challenged with *PbWT* or  
183 *PbCSP*<sup>SIINFEKL</sup> parasites. Protection was assessed by two complementary assays; (i)  
184 determination of the reduction of parasite load in the liver (Fig. 2E) and (ii) induction of sterile  
185 protection (Fig. 2F). Strikingly, parasite load in the liver of Ad-MVA *PbCSP*-vaccinated mice  
186 was not significantly reduced compared to non-vaccinated mice when challenged with  
187 *PbCSP*<sup>SIINFEKL</sup> sporozoites, in marked contrast to challenge with *PbWT* sporozoites. In perfect  
188 agreement, vaccinated mice challenged with *PbCSP*<sup>SIINFEKL</sup> sporozoites were patent for  
189 parasitaemia by day 5, whereas vaccinated mice challenged with *PbWT* sporozoites remained

190 completely protected. These results denote that vaccine-induced effector SYIPSEAKI-specific  
191 CD8<sup>+</sup> T responses efficiently target parasites expressing the cognate epitope. Parasites  
192 lacking the SYIPSAEKI epitope are not eliminated despite high levels of CSP-specific  
193 antibodies evoked by vaccination in this experimental system.

194

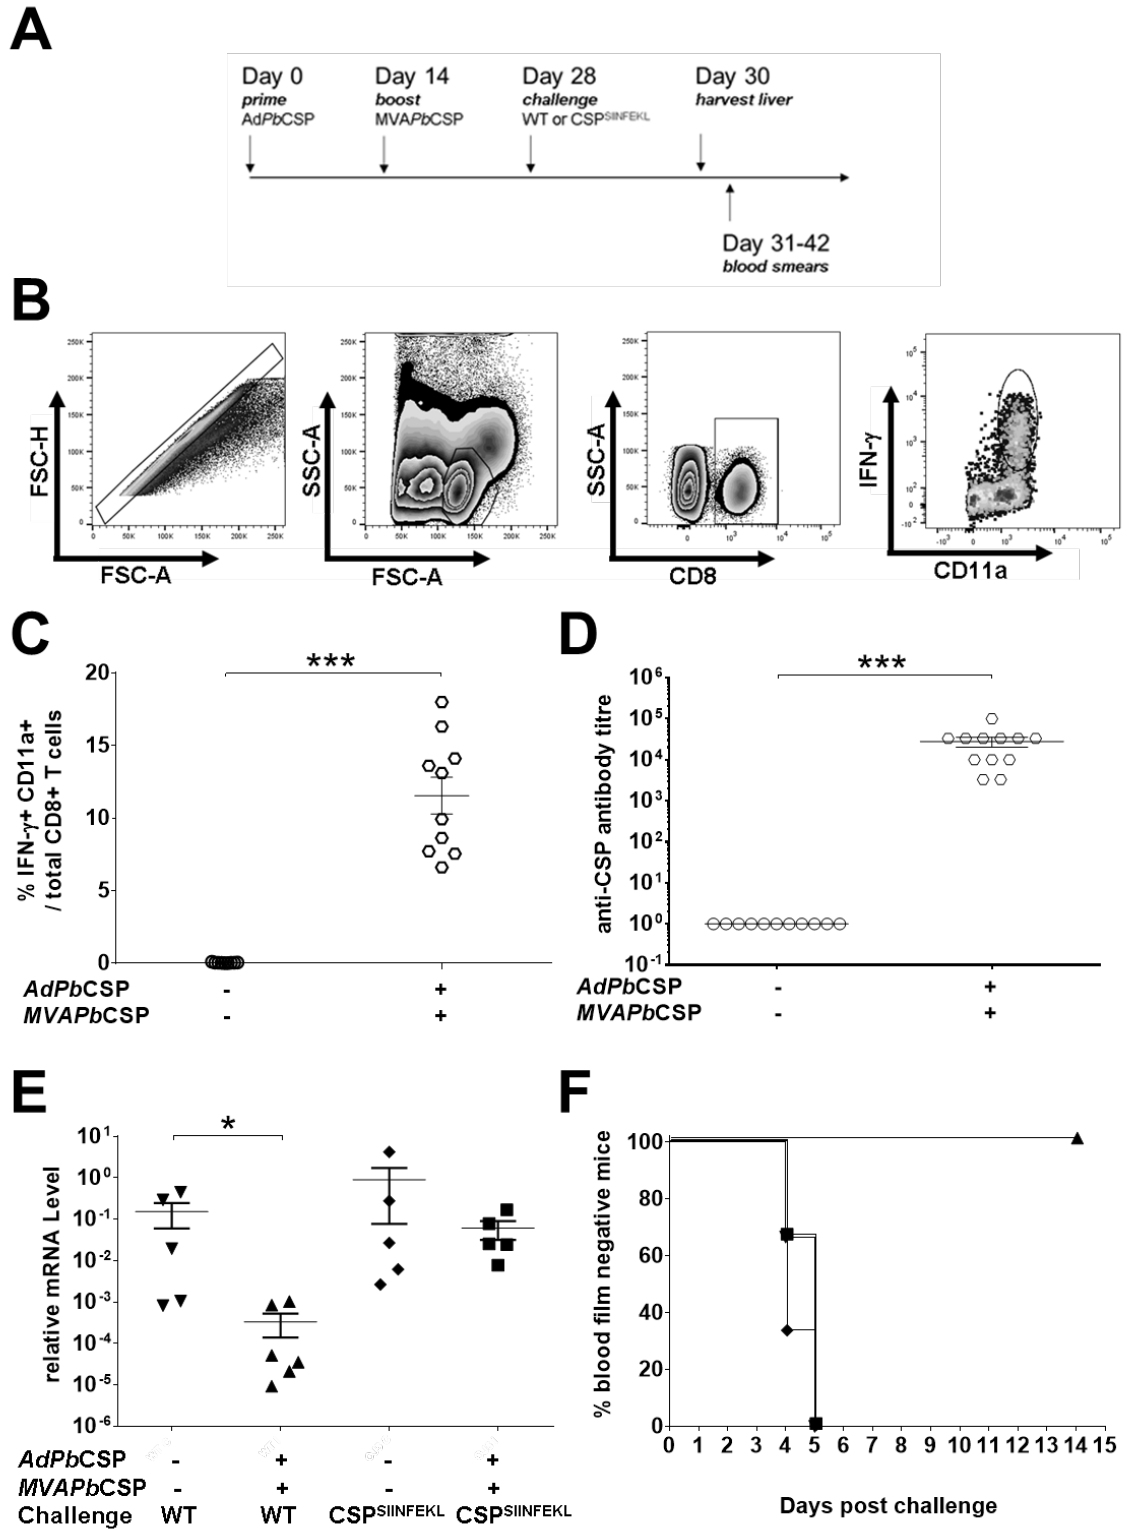

195

196

197

198

199

200 **FIG. 2** Prime-boost vaccination with viral vectored CSP-expressing vaccines induces strong  
201 anti-CSP antibody and CD8<sup>+</sup> T cell responses, and SYIPSAEKI-specific CD8<sup>+</sup> T cell  
202 responses are essential for protection. (A) BALB/c mice were vaccinated with AdCh63 and  
203 MVA vaccines expressing *PbCSP* (*AdPbCSP* and *MVAPbCSP*) and challenged with 10,000  
204 *PbWT* or *PbCSP*<sup>SIINFEKL</sup> sporozoites as shown. (B) Flow cytometry gating strategy used to  
205 determine proportions of IFN- $\gamma$ <sup>+</sup> CD11a<sup>+</sup> CD8<sup>+</sup> T cells. (C) Proportion of IFN- $\gamma$ -producing  
206 CD11a of total CD8<sup>+</sup> T cells. Blood was drawn from the tail from naïve (n=9) and vaccinated  
207 mice (n=10) two weeks after boost and restimulated with SYIPSAEKI and stained for CD8 and  
208 CD11a surface markers, and IFN- $\gamma$  for flow cytometric analysis. (D) Reciprocal antibody titers  
209 of mouse serum reactive to whole sporozoites. Serum from naïve (n=11) and vaccinated mice  
210 (n=12) was isolated two weeks after boost and CSP specific antibody titres were measured by  
211 immunofluorescent antibody assay. (E) Livers from vaccinated mice (+) challenged with *PbWT*  
212 (n=6) or *PbCSP*<sup>SIINFEKL</sup> sporozoites (n=5) and non-vaccinated mice (-) challenged with *PbWT*  
213 (n=5) or *PbCSP*<sup>SIINFEKL</sup> sporozoites (n=5) were harvested 42 hours post-challenge and relative  
214 liver parasite levels were quantified using the  $\Delta\Delta C_t$  method comparing levels of *P. berghei* 18S  
215 rRNA and levels of mouse *GAPDH* mRNA. (F) Groups of vaccinated and non-vaccinated mice  
216 (n=6) were challenged with 5,000 *PbWT* or *PbCSP*<sup>SIINFEKL</sup> sporozoites. Vaccinated mice  
217 challenged with *PbWT* (triangles) or *PbCSP*<sup>SIINFEKL</sup> (squares) and non-vaccinated mice  
218 challenged with *PbWT* (inverted triangles) or *PbCSP*<sup>SIINFEKL</sup> (diamonds) had daily tail smears  
219 taken from day 3-14 post challenge. Slides were stained with Giemsa and parasitaemia was  
220 assessed by microscopy. (C-E) Each data point represents one mouse with mean values  
221 ( $\pm$ SEM) shown and statistics were calculated using the Mann-Whiney test (\*, p<0.05; \*\*\*,  
222 p<0.001).  
223

224 **CSP-based vaccines do not elicit sterile immunity in C57BL/6 mice.**

225 To further investigate the requirement of SYIPSAEKI as the indispensable protective epitope  
226 of CSP, mice unable to present this epitope were vaccinated with the *PbCSP* prime-boost  
227 regimen with an interval of two weeks between vaccines, followed by challenge with either  
228 *PbWT* or *PbCSP*<sup>SIINFEKL</sup> parasites (Fig 3A). C57BL/6 mice were used because SYIPSAEKI is  
229 an H-2-K<sup>d</sup> restricted epitope, and this mouse strain does not express the relevant MHC-I allele.  
230 Thus, SYIPSAEKI would fail to be presented by infected hepatocytes. As before, blood and  
231 serum were derived two weeks after boost. As expected, SYIPSAEKI-specific CD8<sup>+</sup> T cells  
232 (Fig. 3B) were not detectable in Ad-MVA *PbCSP*-vaccinated C57BL/6 mice (Fig. 3C), but  
233 strong anti-CSP antibody titres (1:10<sup>4</sup>) were elicited (Fig. 3D). Ad-MVA CSP-vaccinated  
234 C57BL/6 mice challenged with either *PbWT* or *PbCSP*<sup>SIINFEKL</sup> parasites had comparable  
235 parasite load in the liver (Fig. 3E), indicative of full liver stage development in all groups. In  
236 perfect agreement, all mice from any groups (15/15) developed blood infections.

237

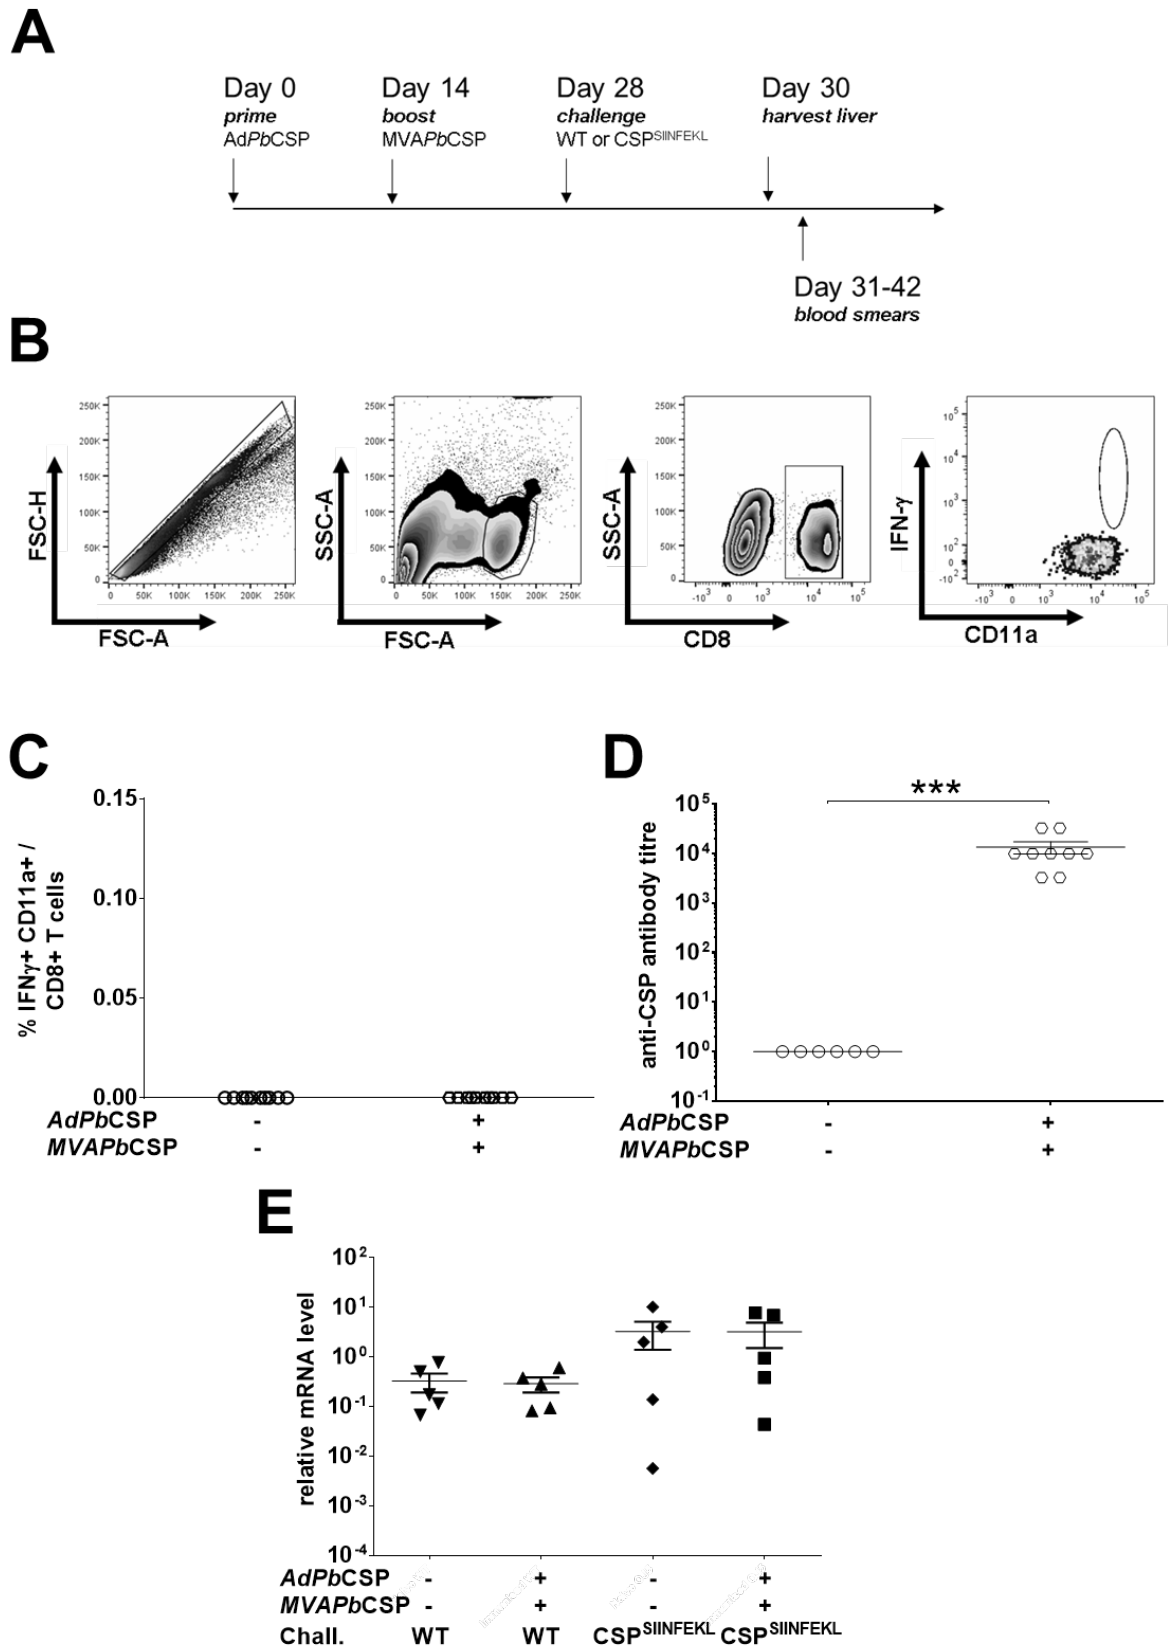

238

239

240

241

242 **FIG 3** Prime-boost vaccination with CSP expressing viruses does not protect C57BL/6 mice,  
243 irrespective of induced antibody titres.

244 (A) C57BL/6 mice were vaccinated with AdCh63 and MVA vaccines *PbCSP* and challenged  
245 with 10,000 *PbWT* or *PbCSP*<sup>SIINFEKL</sup> sporozoites as shown. (B) Flow cytometry gating strategy  
246 used to determine proportions of IFN- $\gamma$ <sup>+</sup> CD11a<sup>+</sup> CD8<sup>+</sup> T cells. (C) Proportion of IFN- $\gamma$ -  
247 producing CD11a of total CD8<sup>+</sup> T cells. Blood was drawn from the tail from naïve (n=10) and  
248 vaccinated mice (n=10) two weeks after boost was restimulated with SYIPSAEKI and stained  
249 for CD8 and CD11a surface markers, and IFN- $\gamma$  for flow cytometric analysis. (D) Reciprocal  
250 antibody titres of mouse serum reactive to whole sporozoites. Serum from naïve (n=6) and  
251 vaccinated mice (n=9) was isolated two weeks after boost and CSP specific antibody titres  
252 were measured by immunofluorescent antibody assay. (E) Livers from groups of 5 mice per  
253 condition were harvested 42 hours post-challenge and relative liver parasite levels were  
254 quantified using the  $\Delta\Delta$ Ct method comparing levels of *P. berghei* 18S rRNA and levels of  
255 mouse *GAPDH* mRNA. None of the differences were significant ( $p>0.05$ ). (C-E). Each data  
256 point represents one mouse with mean values ( $\pm$  SEM) shown and statistics were calculated  
257 using the Mann-Whiney test (\*\* $p<0.001$ ).

258

259 **DISCUSSION**

260 Our findings lend full support to the notion that CSP is an immunodominant sporozoite-derived  
261 antigen (21). A single epitope, SYIPSAEKI, is the immunodominant CD8<sup>+</sup> T cell epitope of  
262 CSP, and we show that it is responsible for the antigen's protective capacity against parasites  
263 in the liver in the BALB/c model. Following RAS immunisation, CD8<sup>+</sup> T cell responses to  
264 SYIPSAEKI contribute to the reduction in parasite load in the liver following sporozoite  
265 challenge, as shown herein. When RAS-immunised mice are challenged with *PbCSP*<sup>SIINFEKL</sup>,  
266 transgenic parasites lacking SYIPSAEKI, reduced anti-*Plasmodium* activity in the liver is  
267 observed. Nonetheless, complete protection is achievable in the absence of SYIPSAEKI-  
268 specific CD8<sup>+</sup> T cell responses, demonstrating that responses to other, yet unidentified, H-2-  
269 K<sup>d</sup>-restricted epitopes contribute to parasite killing. It is conceivable that these epitopes are  
270 encoded by the hundreds of other *Plasmodium* genes expressed in malaria pre-erythrocytic  
271 stages, some of which might be shared with blood stage antigens (25).

272

273 Our findings also emphasise the importance of SYIPSAEKI-specific CD8<sup>+</sup> T cell responses for  
274 promoting protective immunity when using CSP-based viral vaccines in the BALB/c model.  
275 These vaccines are aimed at generating high levels of epitope-specific memory CD8<sup>+</sup> T cells  
276 but rely on the expression of relevant MHC-I in the vaccinated host and the presence of the  
277 cognate epitope in the parasite used for challenge (26). Notably, despite high levels of  
278 antibodies against whole sporozoites elicited following Ad-MVA *PbCSP* vaccination, sterile  
279 protection was not achieved following challenge of C57BL/6 mice. These mice cannot present  
280 SYIPSAEKI, fully supporting the notion that the protective efficacy of CSP strictly depends on  
281 the expression of the immunodominant epitope. These findings were independently  
282 corroborated by the lack of protection in mice, either BALB/c or C57BL/6, immunised with  
283 transgenic sporozoites lacking SYIPSAEKI.

284

285 Together, these results have important implications for the development of next generation  
286 malaria vaccines. We have demonstrated the significance of a single epitope of CSP in  
287 mediating protective CD8<sup>+</sup> T cell responses while also recapitulating that protection can be



288 achieved in the absence of responses to the entire CSP antigen (21, 22). In BALB/c mice,  
289 SYIPSAEKI-specific CD8<sup>+</sup> T cell responses offered protection. However, to achieve complete  
290 sterile protection either multiple sporozoite immunisations or viral vaccines, which induced  
291 large populations of SYIPSAEKI-specific CD8<sup>+</sup> T cells, were required. Multiple immunisations  
292 likely induced a broad range of immune responses and multiple high-dose immunisations with  
293 RAS in humans have been shown to induce dose-dependent anti-sporozoite CD8<sup>+</sup> T cell  
294 responses in addition to dose dependent anti-sporozoite antibody and CD4<sup>+</sup> T cell responses  
295 (4). In line with this, our findings lead us to suggest that future pre-erythrocytic malaria vaccine  
296 research should not only focus on inducing strong CD8<sup>+</sup> T cell responses against one or  
297 multiple antigens, but should try to target a broad array of antigens covering diverse MHC to  
298 offer the best protection possible. The identification of novel antigens and epitopes that  
299 contribute to protection in H-2-K<sup>d</sup>-restricted BALB/c mice, and ultimately in human populations  
300 with broad MHC haplotypes, will aid this development. In C57BL/6 mice pre-erythrocytic  
301 immunity is mounted irrespective of CSP-specific CD8<sup>+</sup> T cell responses, and recent genome-  
302 wide epitope profiling returned multiple sporozoite antigens and epitopes (27-29).  
303 RTS,S/AS01, the leading subunit malaria vaccine based on CSP, seems to offer some  
304 protection against *P. falciparum* re-infection (9). Partial and short-lived protection is likely  
305 primarily mediated by the action of transitory anti-sporozoite antibodies (30-32). Strikingly,  
306 peripheral blood CD8<sup>+</sup> T cell responses were not identified to provide a role following  
307 sporozoite challenge in this candidate vaccine. Together with previous findings (7, 14, 16, 21)  
308 our data underscore efforts to improve the most advanced candidate malaria vaccine,  
309 RTS,S/AS01, by eliciting CD8<sup>+</sup> T cells against CSP or other immunodominant antigens.  
310

311 **MATERIALS AND METHODS**

312 **Ethics and animal experimentation.** Animal procedures were performed in accordance with  
313 the German 'Tierschutzgesetz in der Fassung vom 18. Mai 2006 (BGBl. I S. 1207)' which  
314 implements the directive 2010/6 3/EU from the European Union. The protocol was approved  
315 by the ethics committee of the Berlin state authority ('Landesamt für Gesundheit und Soziales  
316 Berlin', permit number G0469/09). Animal experiments at London School of Hygiene and  
317 Tropical Medicine were conducted under license from the United Kingdom Home Office under  
318 the Animals (Scientific Procedures) Act 1986. CD-1 mice were bred in-house at LSHTM, while  
319 NMRI, C57BL/6 and BALB/c laboratory mouse strains were purchased from either Charles  
320 River Laboratories (Margate, UK or Sulzfeld, Germany) or Janvier (Saint Berthevin, France).  
321 Female mice of 6-8 weeks of age were used in the experiments.

322

323 **Plasmodium parasites and immunisation.** The transgenic *P. berghei* ANKA CSP<sup>SIINFEKL</sup>  
324 (*PbCSP*<sup>SIINFEKL</sup>) parasite was generated with the immunodominant CSP CD8+ T cell epitope  
325 SYIPSAEKI (252-260aa) being replaced with the H-2<sup>b</sup> restricted *Gallus gallus* ovalbumin  
326 CD8+ T cell epitope SIINFEKL (258-265aa) via double homologous recombination ((23),  
327 Müller and Gibbins *et al.*, unpublished). Wild-type *Plasmodium berghei* ANKA (clone c115cy1)  
328 (*PbWT*) and *PbCSP*<sup>SIINFEKL</sup> were maintained by continuous cycling between murine hosts  
329 (NMRI or CD-1) and *Anopheles stephensi* mosquitos. Infected mosquitos were kept in  
330 incubators (Panasonic and Mytron) at 80% humidity and 20°C temperature. Sporozoites were  
331 isolated from the salivary glands and attenuated by  $\gamma$ -irradiation at  $1.2 \times 10^4$  cGy. Mice were  
332 immunised with 10,000 sporozoites administered intravenously with multiple doses given one  
333 week apart unless otherwise stated. For challenge infections, 5,000 or 10,000 sporozoites were  
334 administered intravenously to assess sterile protection and parasite load in the liver,  
335 respectively.

336

337 **Viral-vectored CSP-expressing vaccines.** AdCh63 and MVA vaccines expressing the  
338 mammalian codon-optimised fragment of *PbCSP* were constructed and propagated based on  
339 previously published viral vectors (33, 34). The viral vectors were administered intramuscularly

340 in endotoxin-free PBS at a concentration of  $10^5$  viral particles for AdPbCSP for the prime  
341 immunisation and  $10^6$  viral particles MVAPbCSP for the boost immunisation.

342

343 **Immunofluorescent antibody assay.** 10,000 sporozoites were spotted onto epoxy coated  
344 glass slides with marked rings (Medco), dried at room temperature and stored at  $-20^{\circ}\text{C}$ .  
345 Thawed slides were fixed in acetone, dried and rehydrated with PBS before incubation in 10%  
346 FCS supplemented DMEM (Gibco) for 1 hour at  $37^{\circ}\text{C}$  in a humid chamber. Serum at  
347 concentrations  $1:10^3$ ,  $1:3.3 \times 10^3$ ,  $1:10^4$ ,  $1:3.3 \times 10^4$ ,  $1:10^5$  (and, additionally,  $1:3.3 \times 10^5$  and  $1:10^6$   
348 for C57BL/6 serum) were added to the ring wells and incubated for 1 hour at  $37^{\circ}\text{C}$  in a humid  
349 chamber. Slides were washed and stained with a mouse anti-CSP (35) primary antibody.  
350 Hoechst33342 was added as the nuclear stain together with a respective fluorescently labelled  
351 anti-mouse secondary antibody for a further one-hour incubation. Slides were washed and  
352 mounted with 'Fluoromount-G' (Southern Biotech) and analysed by fluorescent microscopy  
353 (Zeiss Axio Observer).

354

355 **Quantification of SYIPSAEKI-specific CD8+ T cell responses.** Spleens were harvested and  
356 lymphocytes were derived by passing spleens through  $40\mu\text{m}$  cell strainers (Corning).  
357 Peripheral blood was drawn from the tail vein and collected in  $\text{Na}^+$  heparin capillary tubes  
358 (Brand) and assayed in 96-well flat bottom plates (Corning). Red blood cells were lysed using  
359 PharmLyse (BD) and lymphocytes were resuspended in 10% FCS, 2% Penicillin-Streptomycin  
360 and 1% L-glutamine supplemented RPMI 1640 (Gibco). Splenocytes were counted using a  
361 40x dilution with Trypan Blue (ThermoFisher Scientific) and a Neubauer 'Improved'  
362 haemocytometer (Biochrom).  $2 \times 10^6$  splenocytes and the lysed blood samples were prepared  
363 in 96 well plates and incubated with a final concentration of  $10\mu\text{g/ml}$  of SYIPSAEKI peptide in  
364 in the presence of Brefeldin A (eBioScience) for 5-6 hours at  $37^{\circ}\text{C}$  and 5%  $\text{CO}_2$ . For staining  
365 of cell surface markers and intracellular cytokines, cells were incubated for 1 hour at  $4^{\circ}\text{C}$  for  
366 each staining. Cells were stained for CD8 (53-6.7) and CD11a (M17/4) (eBioscience). Splenic  
367 cells were fixed with 4% paraformaldehyde and peripheral blood cells were fixed with 1%

368 paraformaldehyde before staining for IFN- $\gamma$  (XMG1.2) (eBioscience) in the presence of  
369 Perm/Wash buffer (BD) for intracellular staining. Data was acquired by flow cytometry using  
370 an LSRFortessa or LSRII (BD) and analysed using Flowjo9.5.2 (Tree Star, Inc.).

371

372 **Quantification of parasite load in the liver.** Livers were harvested 40-42 hours after  
373 sporozoite challenge and total RNA was extracted following homogenisation using TRIzol  
374 (ThermoFisher Scientific). cDNA was generated using the RETROScript Kit (Ambion).  
375 Quantitative real-time PCR was performed using the StepOnePlus Real-Time PCR System  
376 and Power SYBR Green PCR Master Mix (Applied Biosystems). Relative liver parasite levels  
377 were quantified using the  $\Delta\Delta C_t$  method comparing levels of *P. berghei* 18S rRNA using specific  
378 primers and normalised to levels of mouse *GAPDH* mRNA (36).

379

380 **Assessment of parasitaemia.** Sterile protection was assessed by daily blood smears, taken  
381 from mice 3-14 days after sporozoite challenge, stained with Giemsa (improved solution; VWR)  
382 to microscopically determine the presence of blood stage parasites.

383

384 **Statistical analysis.** Statistical analysis was performed using GraphPad Prism v7 (GraphPad  
385 Software, Inc.). Statistics were calculated using the Mann-Whitney U test.

386

387 **AUTHOR CONTRIBUTIONS**

388 O.S. and J.C.R.H. designed the experiments in the laboratory of K.Matuschewski; O.S.  
389 generated the transgenic parasites CSP<sup>SIINFEKL</sup>; M.P.G., K.Müller., M.G., J.L. and E.D.P.  
390 performed experiments and analysed data; K.B. and A.R.-S. generated the CSP-expressing  
391 viruses AdPbCSP and MVAPbCSP; M.P.G. and J.C.R.H. wrote the paper. All authors  
392 commented on and approved the paper.

393

394 **ACKNOWLEDGEMENTS**

395 J.C.R.H. was funded by grants from The Royal Society (University Research Fellowship  
396 UF0762736/UF120026 and Project Grant RG130034) and the National Centre for the  
397 Replacement, Refinement & Reduction of Animals in Research (Project Grant NC/L000601/1).  
398 O.S. was funded in part by the Laboratoire d'Excellence ParaFrap (ANR-11-LABX-0024).  
399 K.Matuschewski was supported by the Max Planck Society and grants from the European  
400 Commission (EviMalaR Network of Excellence #34), the Chica and Heinz Schaller Foundation,  
401 and the Alliance Berlin Canberra "Crossing Boundaries: Molecular Interactions in Malaria",  
402 which is co-funded by a grant from the Deutsche Forschungsgemeinschaft (DFG) for the  
403 International Research Training Group (IRTG) 2290 and the Australian National University.  
404 A.R.-S., a Jenner Investigator and an Oxford Martin Fellow, was funded by a Wellcome Trust  
405 Career Development Fellowship (Grant 097395/Z/11/Z). We would like to thank the Jenner  
406 Institute's Viral Vector Core Facility for the viral vectored vaccines. The funders had no role in  
407 study design, data collection and analysis, decision to publish, or preparation of the  
408 manuscript.

## 409 REFERENCES

410

- 411 1. WHO. 2017. World Malaria Report 2017 World Health Organisation, Geneva, Switzerland.
- 412 2. Nussenzweig RS, Vanderberg J, Most H, Orton C. 1967. Protective immunity produced by the  
413 injection of x-irradiated sporozoites of *Plasmodium berghei*. Nature 216:160-2.
- 414 3. Hoffman SL, Goh LM, Luke TC, Schneider I, Le TP, Doolan DL, Sacci J, de la Vega P, Dowler M,  
415 Paul C, Gordon DM, Stoute JA, Church LW, Sedegah M, Heppner DG, Ballou WR, Richie TL.  
416 2002. Protection of humans against malaria by immunization with radiation-attenuated  
417 *Plasmodium falciparum* sporozoites. J Infect Dis 185:1155-64.
- 418 4. Seder RA, Chang LJ, Enama ME, Zephir KL, Sarwar UN, Gordon IJ, Holman LA, James ER,  
419 Billingsley PF, Gunasekera A, Richman A, Chakravarty S, Manoj A, Velmurugan S, Li M, Ruben  
420 AJ, Li T, Eappen AG, Stafford RE, Plummer SH, Hendel CS, Novik L, Costner PJ, Mendoza FH,  
421 Saunders JG, Nason MC, Richardson JH, Murphy J, Davidson SA, Richie TL, Sedegah M,  
422 Sutamihardja A, Fahle GA, Lyke KE, Laurens MB, Roederer M, Tewari K, Epstein JE, Sim BK,  
423 Ledgerwood JE, Graham BS, Hoffman SL, Team VRCS. 2013. Protection against malaria by  
424 intravenous immunization with a nonreplicating sporozoite vaccine. Science 341:1359-65.
- 425 5. Schofield L, Villaquiran J, Ferreira A, Schellekens H, Nussenzweig R, Nussenzweig V. 1987.  
426 Gamma interferon, CD8+ T cells and antibodies required for immunity to malaria sporozoites.  
427 Nature 330:664-6.
- 428 6. Doolan DL, Hoffman SL. 2000. The complexity of protective immunity against liver-stage  
429 malaria. J Immunol 165:1453-62.
- 430 7. Schmidt NW, Podyminogin RL, Butler NS, Badovinac VP, Tucker BJ, Bahjat KS, Lauer P, Reyes-  
431 Sandoval A, Hutchings CL, Moore AC, Gilbert SC, Hill AV, Bartholomay LC, Harty JT. 2008.  
432 Memory CD8 T cell responses exceeding a large but definable threshold provide long-term  
433 immunity to malaria. Proc Natl Acad Sci U S A 105:14017-22.
- 434 8. Weiss WR, Jiang CG. 2012. Protective CD8+ T lymphocytes in primates immunized with  
435 malaria sporozoites. PLoS One 7:e31247.
- 436 9. RTS SCTP. 2015. Efficacy and safety of RTS,S/AS01 malaria vaccine with or without a booster  
437 dose in infants and children in Africa: final results of a phase 3, individually randomised,  
438 controlled trial. Lancet 386:31-45.
- 439 10. Romero P, Maryanski JL, Corradin G, Nussenzweig RS, Nussenzweig V, Zavala F. 1989. Cloned  
440 cytotoxic T cells recognize an epitope in the circumsporozoite protein and protect against  
441 malaria. Nature 341:323-6.
- 442 11. Weiss WR, Mellouk S, Houghten RA, Sedegah M, Kumar S, Good MF, Berzofsky JA, Miller LH,  
443 Hoffman SL. 1990. Cytotoxic T cells recognize a peptide from the circumsporozoite protein on  
444 malaria-infected hepatocytes. J Exp Med 171:763-73.
- 445 12. Li S, Rodrigues M, Rodriguez D, Rodriguez JR, Esteban M, Palese P, Nussenzweig RS, Zavala F.  
446 1993. Priming with recombinant influenza virus followed by administration of recombinant  
447 vaccinia virus induces CD8+ T-cell-mediated protective immunity against malaria. Proc Natl  
448 Acad Sci U S A 90:5214-8.
- 449 13. Rodrigues EG, Zavala F, Eichinger D, Wilson JM, Tsuji M. 1997. Single immunizing dose of  
450 recombinant adenovirus efficiently induces CD8+ T cell-mediated protective immunity  
451 against malaria. J Immunol 158:1268-74.
- 452 14. Bruna-Romero O, Gonzalez-Aseguinolaza G, Hafalla JC, Tsuji M, Nussenzweig RS. 2001.  
453 Complete, long-lasting protection against malaria of mice primed and boosted with two  
454 distinct viral vectors expressing the same plasmodial antigen. Proc Natl Acad Sci U S A  
455 98:11491-6.
- 456 15. Gilbert SC, Schneider J, Hannan CM, Hu JT, Plebanski M, Sinden R, Hill AV. 2002. Enhanced  
457 CD8 T cell immunogenicity and protective efficacy in a mouse malaria model using a  
458 recombinant adenoviral vaccine in heterologous prime-boost immunisation regimes. Vaccine  
459 20:1039-45.

- 460 16. Gonzalez-Aseguinolaza G, Nakaya Y, Molano A, Dy E, Esteban M, Rodriguez D, Rodriguez JR,  
461 Palese P, Garcia-Sastre A, Nussenzweig RS. 2003. Induction of protective immunity against  
462 malaria by priming-boosting immunization with recombinant cold-adapted influenza and  
463 modified vaccinia Ankara viruses expressing a CD8+ T-cell epitope derived from the  
464 circumsporozoite protein of *Plasmodium yoelii*. *J Virol* 77:11859-66.
- 465 17. Reyes-Sandoval A, Sridhar S, Berthoud T, Moore AC, Harty JT, Gilbert SC, Gao G, Ertl HC,  
466 Wilson JC, Hill AV. 2008. Single-dose immunogenicity and protective efficacy of simian  
467 adenoviral vectors against *Plasmodium berghei*. *Eur J Immunol* 38:732-41.
- 468 18. Reyes-Sandoval A, Berthoud T, Alder N, Siani L, Gilbert SC, Nicosia A, Colloca S, Cortese R, Hill  
469 AV. 2010. Prime-boost immunization with adenoviral and modified vaccinia virus Ankara  
470 vectors enhances the durability and polyfunctionality of protective malaria CD8+ T-cell  
471 responses. *Infect Immun* 78:145-53.
- 472 19. Dodoo D, Hollingdale MR, Anum D, Koram KA, Gyan B, Akanmori BD, Ocran J, Adu-  
473 Amankwah S, Geneshan H, Abot E, Legano J, Banania G, Sayo R, Brambilla D, Kumar S, Doolan  
474 DL, Rogers WO, Epstein J, Richie TL, Sedegah M. 2011. Measuring naturally acquired immune  
475 responses to candidate malaria vaccine antigens in Ghanaian adults. *Malar J* 10:168.
- 476 20. Schmidt NW, Butler NS, Badovinac VP, Harty JT. 2010. Extreme CD8 T cell requirements for  
477 anti-malarial liver-stage immunity following immunization with radiation attenuated  
478 sporozoites. *PLoS Pathog* 6:e1000998.
- 479 21. Kumar KA, Sano G, Boscardin S, Nussenzweig RS, Nussenzweig MC, Zavala F, Nussenzweig V.  
480 2006. The circumsporozoite protein is an immunodominant protective antigen in irradiated  
481 sporozoites. *Nature* 444:937-40.
- 482 22. Gruner AC, Mauduit M, Tewari R, Romero JF, Depinay N, Kayibanda M, Lallemand E, Chavatte  
483 JM, Crisanti A, Sinnis P, Mazier D, Corradin G, Snounou G, Renia L. 2007. Sterile protection  
484 against malaria is independent of immune responses to the circumsporozoite protein. *PLoS*  
485 *One* 2:e1371.
- 486 23. Cockburn IA, Tse SW, Radtke AJ, Srinivasan P, Chen YC, Sinnis P, Zavala F. 2011. Dendritic cells  
487 and hepatocytes use distinct pathways to process protective antigen from plasmodium in  
488 vivo. *PLoS Pathog* 7:e1001318.
- 489 24. Rai D, Pham NL, Harty JT, Badovinac VP. 2009. Tracking the total CD8 T cell response to  
490 infection reveals substantial discordance in magnitude and kinetics between inbred and  
491 outbred hosts. *J Immunol* 183:7672-81.
- 492 25. Muller K, Gibbins MP, Matuschewski K, Hafalla JCR. 2017. Evidence of cross-stage CD8+ T cell  
493 epitopes in malaria pre-erythrocytic and blood stage infections. *Parasite Immunol* 39.
- 494 26. Silvie O, Amino R, Hafalla JC. 2017. Tissue-specific cellular immune responses to malaria pre-  
495 erythrocytic stages. *Curr Opin Microbiol* 40:160-167.
- 496 27. Hafalla JC, Bauza K, Friesen J, Gonzalez-Aseguinolaza G, Hill AV, Matuschewski K. 2013.  
497 Identification of targets of CD8(+) T cell responses to malaria liver stages by genome-wide  
498 epitope profiling. *PLoS Pathog* 9:e1003303.
- 499 28. Lau LS, Fernandez-Ruiz D, Mollard V, Sturm A, Neller MA, Cozijnsen A, Gregory JL, Davey GM,  
500 Jones CM, Lin YH, Haque A, Engwerda CR, Nie CQ, Hansen DS, Murphy KM, Papenfuss AT,  
501 Miles JJ, Burrows SR, de Koning-Ward T, McFadden GI, Carbone FR, Crabb BS, Heath WR.  
502 2014. CD8+ T cells from a novel T cell receptor transgenic mouse induce liver-stage immunity  
503 that can be boosted by blood-stage infection in rodent malaria. *PLoS Pathog* 10:e1004135.
- 504 29. Pichugin A, Zarling S, Perazzo L, Duffy PE, Ploegh HL, Krzych U. 2018. Identification of a Novel  
505 CD8 T Cell Epitope Derived from *Plasmodium berghei* Protective Liver-Stage Antigen. *Front*  
506 *Immunol* 9:91.
- 507 30. Olotu A, Lusingu J, Leach A, Lievens M, Vekemans J, Msham S, Lang T, Gould J, Dubois MC,  
508 Jongert E, Vansadia P, Carter T, Njuguna P, Awuondo KO, Malabeja A, Abdul O, Gesase S,  
509 Mturi N, Drakeley CJ, Savarese B, Villafana T, Lapierre D, Ballou WR, Cohen J, Lemnge MM,  
510 Peshu N, Marsh K, Riley EM, von Seidlein L, Bejon P. 2011. Efficacy of RTS,S/AS01E malaria  
511 vaccine and exploratory analysis on anti-circumsporozoite antibody titres and protection in

- 512 children aged 5-17 months in Kenya and Tanzania: a randomised controlled trial. *Lancet*  
513 *Infect Dis* 11:102-9.
- 514 31. White MT, Verity R, Griffin JT, Asante KP, Owusu-Agyei S, Greenwood B, Drakeley C, Gesase  
515 S, Lusingu J, Ansong D, Adjei S, Agbenyega T, Ogutu B, Otieno L, Otieno W, Agnandji ST, Lell B,  
516 Kreamsner P, Hoffman I, Martinson F, Kamthunzu P, Tinto H, Valea I, Sorgho H, Onoko M,  
517 Otieno K, Hamel MJ, Salim N, Mtoro A, Abdulla S, Aide P, Sacarlal J, Aponte JJ, Njuguna P,  
518 Marsh K, Bejon P, Riley EM, Ghani AC. 2015. Immunogenicity of the RTS,S/AS01 malaria  
519 vaccine and implications for duration of vaccine efficacy: secondary analysis of data from a  
520 phase 3 randomised controlled trial. *Lancet Infect Dis* 15:1450-8.
- 521 32. Kester KE, Cummings JF, Ofori-Anyinam O, Ockenhouse CF, Krzych U, Moris P, Schwenk R,  
522 Nielsen RA, Debebe Z, Pinelis E, Juompan L, Williams J, Dowler M, Stewart VA, Wirtz RA,  
523 Dubois MC, Lievens M, Cohen J, Ballou WR, Heppner DG, Jr., Rts SVEG. 2009. Randomized,  
524 double-blind, phase 2a trial of falciparum malaria vaccines RTS,S/AS01B and RTS,S/AS02A in  
525 malaria-naive adults: safety, efficacy, and immunologic associates of protection. *J Infect Dis*  
526 200:337-46.
- 527 33. O'Hara GA, Duncan CJ, Ewer KJ, Collins KA, Elias SC, Halstead FD, Goodman AL, Edwards NJ,  
528 Reyes-Sandoval A, Bird P, Rowland R, Sheehy SH, Poulton ID, Hutchings C, Todryk S, Andrews  
529 L, Folgori A, Berrie E, Moyle S, Nicosia A, Colloca S, Cortese R, Siani L, Lawrie AM, Gilbert SC,  
530 Hill AV. 2012. Clinical assessment of a recombinant simian adenovirus ChAd63: a potent new  
531 vaccine vector. *J Infect Dis* 205:772-81.
- 532 34. Reyes-Sandoval A, Wyllie DH, Bauza K, Milicic A, Forbes EK, Rollier CS, Hill AV. 2011. CD8+ T  
533 effector memory cells protect against liver-stage malaria. *J Immunol* 187:1347-57.
- 534 35. Potocnjak P, Yoshida N, Nussenzweig RS, Nussenzweig V. 1980. Monovalent fragments (Fab)  
535 of monoclonal antibodies to a sporozoite surface antigen (Pb44) protect mice against  
536 malarial infection. *J Exp Med* 151:1504-13.
- 537 36. Muller K, Matuschewski K, Silvie O. 2011. The Puf-family RNA-binding protein Puf2 controls  
538 sporozoite conversion to liver stages in the malaria parasite. *PLoS One* 6:e19860.  
539
